# Supplementary material for: Self-sensing coaxial muscle fibers with bi-lengthwise actuation
Source: Royal Society of Chemistry journal article supplement (doi:10.1039/d1mh00743b), 2021-01-01
Supplement: d1mh00743b7.pdf [file d1mh00743b7.pdf]

## Supporting Information

### **Self-Sensing Coaxial Muscle Fibers with Bi-Lengthwise Actuation**

Lizhong Dong,<sup>ab</sup> Ming Ren,<sup>ab</sup> Yulian Wang,<sup>ab</sup> Jian Qiao,<sup>b</sup> Yulong Wu,<sup>b</sup> Jianfeng He,<sup>ab</sup> Xulin Wei,<sup>ab</sup>

Jiangtao Di<sup>\*abc</sup> and Qingwen Li<sup>\*abc</sup>

<sup>a</sup> School of Nano-Technology and Nano-Bionics, University of Science and Technology of China, Hefei 230026, China

<sup>b</sup> Advanced Materials Division, Key Laboratory of Multifunctional Nanomaterials and Smart Systems, Suzhou Institute of Nano-Tech and Nano-Bionics, Chinese Academy of Sciences, Suzhou 215123, China

<sup>c</sup> Division of Nanomaterials, Suzhou Institute of Nano-Tech and Nano-Bionics, Chinese Academy of Sciences, Nanchang 330200, China

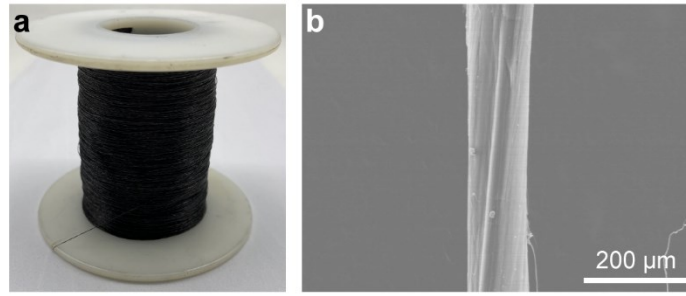

**Fig. S1** (a) Photograph of a hundreds-meter-long CNT fiber wound on a mandrel. (b) SEM image of the surface of the CNT fiber. The diameter of the CNT ribbon is ~122 μm.

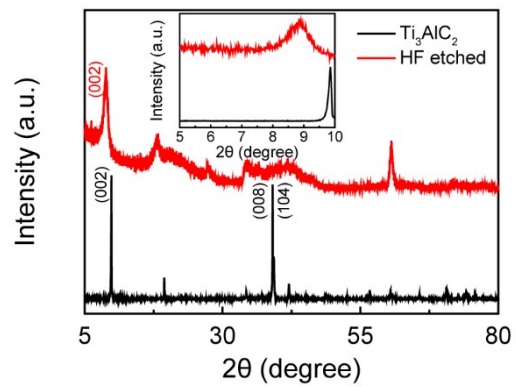

**Fig. S2** XRD patterns of Ti<sub>3</sub>AlC<sub>2</sub> MAX phase and Ti<sub>3</sub>C<sub>2</sub>T<sub>x</sub>.

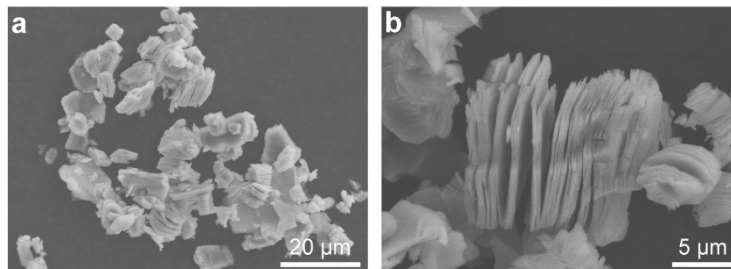

**Fig. S3** SEM images of Ti<sub>3</sub>C<sub>2</sub>T<sub>x</sub>.

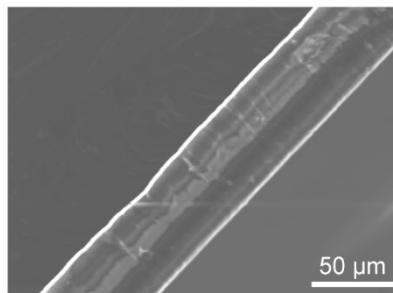

**Fig. S4** The thickness of the PDMS ribbon (50 μm).

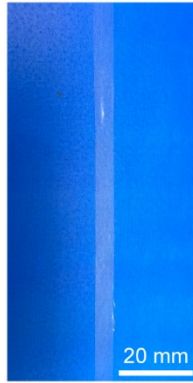

**Fig. S5** Photograph of the PDMS ribbon, the width is 5 mm.

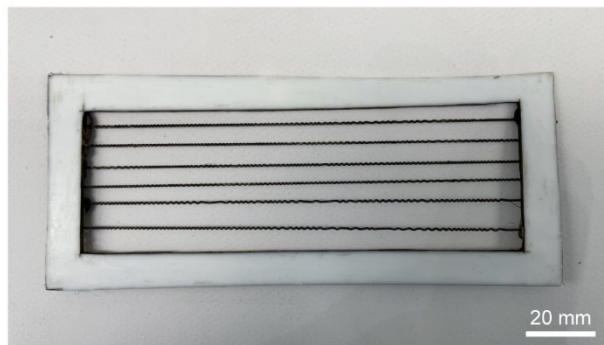

**Fig. S6** Photograph of the pre-stretched CNT@PDMS coaxial fiber polymerized by dopamine (polymerized for 48 h at 30 °C).

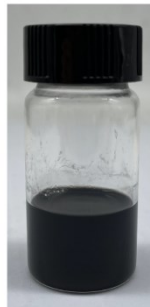

**Fig. S7** Photograph of the MXene and SWCNTs 3D conductive network dispersion.

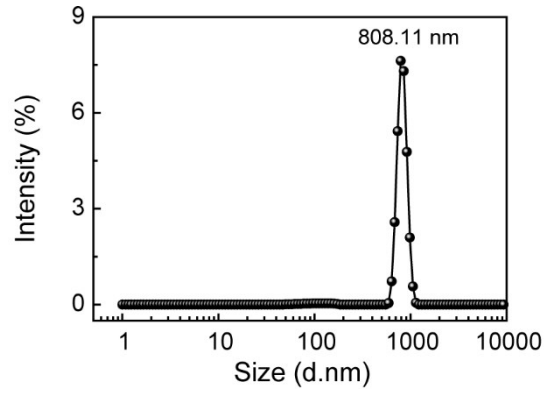

**Fig. S8** Average particle size distribution of  $Ti_3C_2T_x$ .

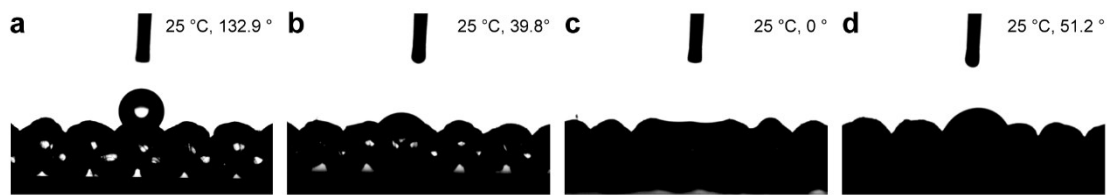

**Fig. S9** Water contact angle corresponding to different fibers. (a) The CNT@PDMS coiled coaxial fiber. (b) The CNT@PDMS coiled coaxial fiber after oxygen plasma treatment. (c) The CNT@PDMS coiled coaxial fiber after polymerizing dopamine. (d) The MXene/SWCNTs-coated CNT@PDMS coiled coaxial fiber.

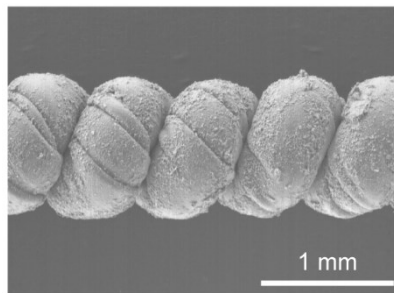

**Fig. S10** The SEM image of the MXene/SWCNTs-coated CNT@PDMS coaxial muscle fiber.

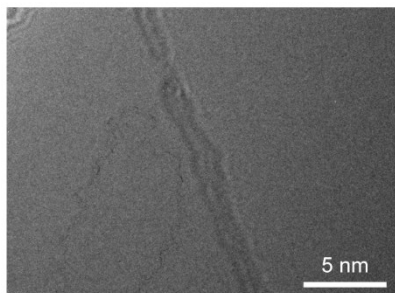

**Fig. S11** TEM image of the typical SWCNTs in the MXene and SWCNTs 3D conductive network, showing the CNTs have one graphitic wall and the diameter is  $\sim 1-3$  nm.

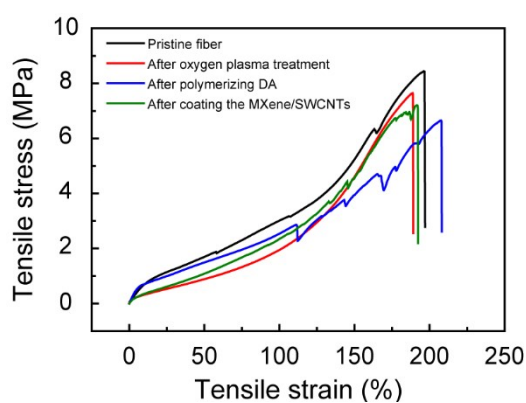

**Fig. S12** Mechanical properties corresponding to different fibers (the CNT@PDMS coiled coaxial fiber, the CNT@PDMS coiled coaxial fiber after oxygen plasma treatment, the CNT@PDMS coiled coaxial fiber after polymerizing dopamine, the MXene/SWCNTs-coated CNT@PDMS coiled coaxial fiber).

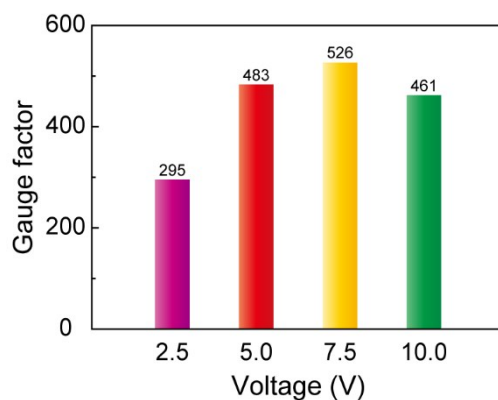

**Fig. S13** The gauge factor of real-time sensing feedback signal during contractile process under different voltages.

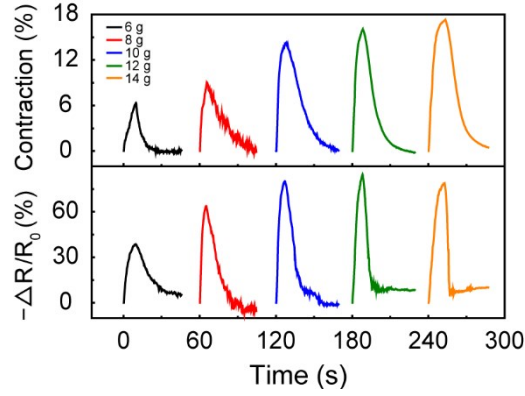

**Fig. S14** Contraction and relative resistance change ( $-\Delta R/R_0$ ) as a function of time under a 10 V voltage with different loads.

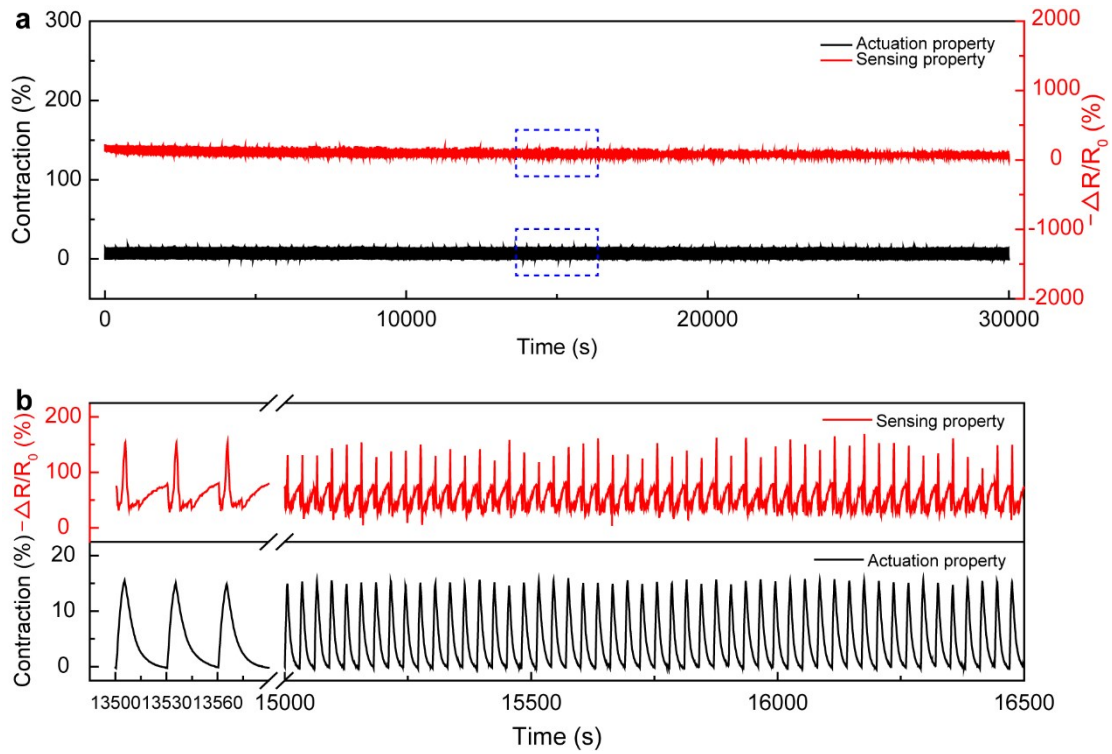

**Fig. S15** (a) Cyclic tests of the contraction with real-time sensing signal feedbacks (under a 10 V voltage with a 14 g load, powering on for 5 s and powering off for 25 s) on the MXene/SWCNTs-coated CNT@PDMS coaxial muscle fiber, 1 000 actuating cycles. (b) The curve of the 100 actuating cycles with real-time sensing signal feedbacks from 450th to 550th.

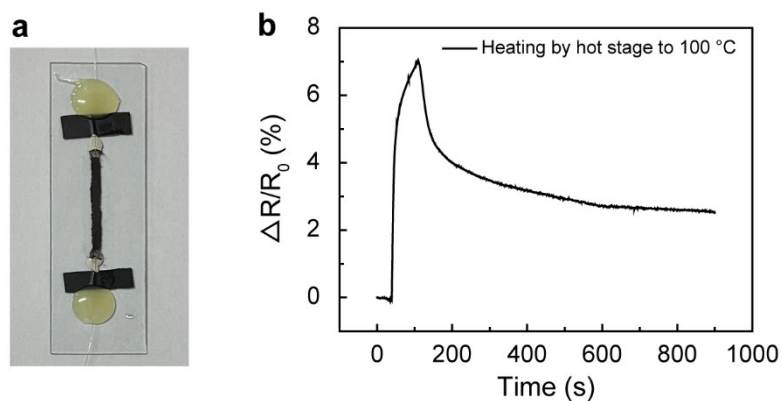

**Fig. S16** (a) Photograph of a device for measuring sensing signal on the hot stage of the MXene/SWCNTs 3D conductive network sensing layer. (b) The sensing signal of the MXene/SWCNTs 3D conductive network sensing layer was measured by a 100 °C hot stage.

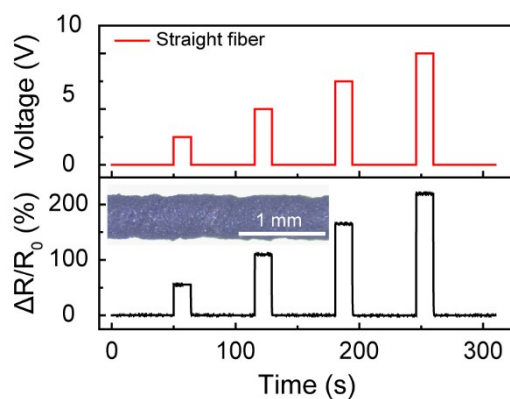

**Fig. S17** The sensing property of the MXene/SWCNTs-coated CNT@PDMS straight coaxial fiber with restricted length under different voltage. The inset is the photograph under the optical microscope of the MXene/SWCNTs-coated CNT@PDMS straight coaxial fiber.

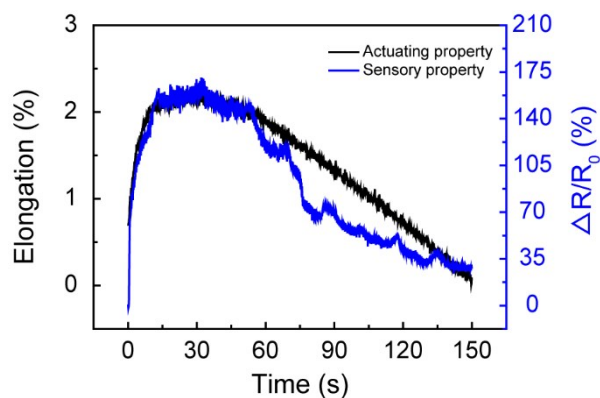

**Fig. S18** Elongation and relative resistance change ( $\Delta R/R_0$ ) as a function of time under the 2 g load.

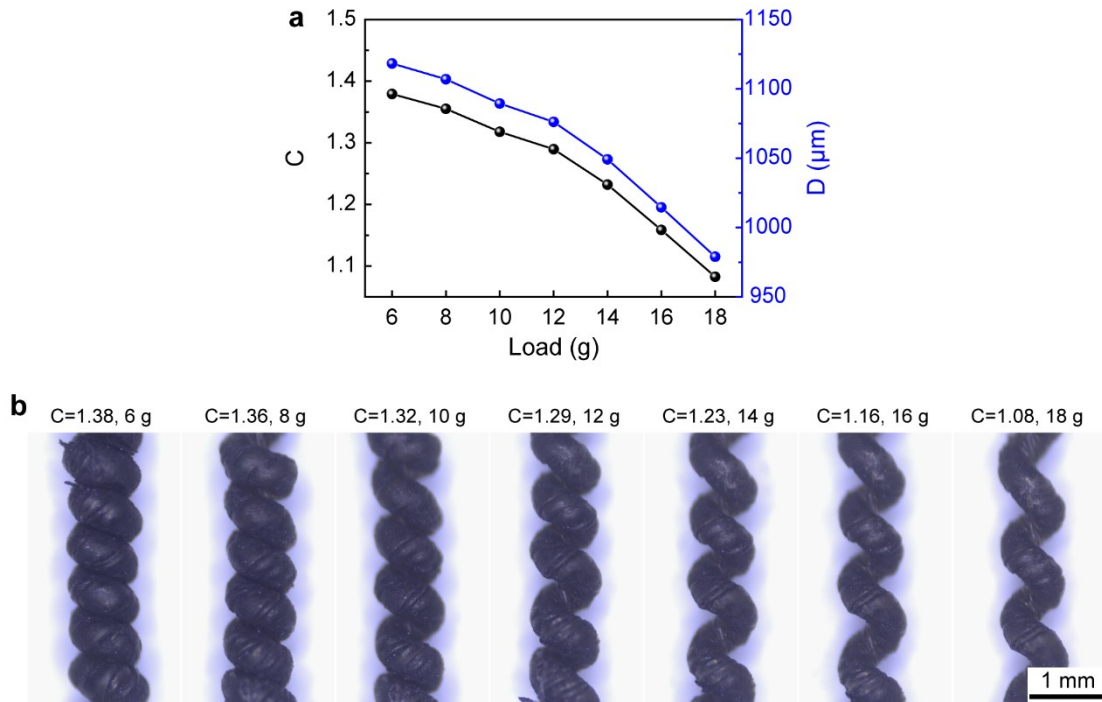

**Fig. S19** (a) The spring index and the radial diameter of the MXene/SWCNTs-coated CNT@PDMS coaxial muscle fiber under different loads (6 g, 8 g, 10 g, 12 g, 14 g, 16 g and 18 g). (b) The photographs under the optical microscope of the MXene/SWCNTs-coated CNT@PDMS coaxial muscle fiber under different loads.

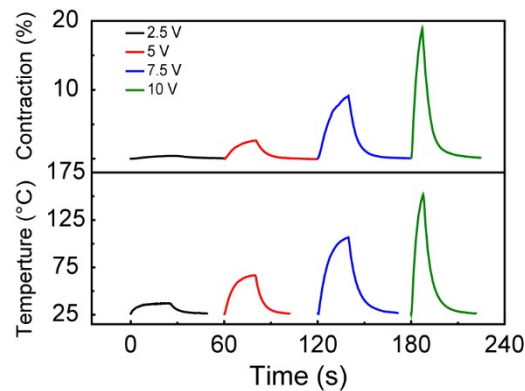

**Fig. S20** Contraction and temperature as a function of time under different voltages with a 14 g load, before the coaxial muscle fiber contracts to the extreme stroke without creeping, the optimal actuating temperature of the coaxial muscle fiber under different voltages is found.



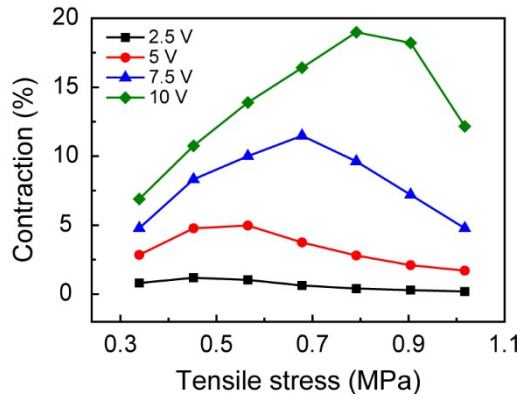

**Fig. S21** The contraction of the MXene/SWCNTs-coated CNT@PDMS coaxial muscle fiber under different voltages (2.5 V, 5 V, 7.5 V and 10 V) with different loads (6 g, 8 g, 10 g, 12 g, 14 g, 16 g and 18 g).

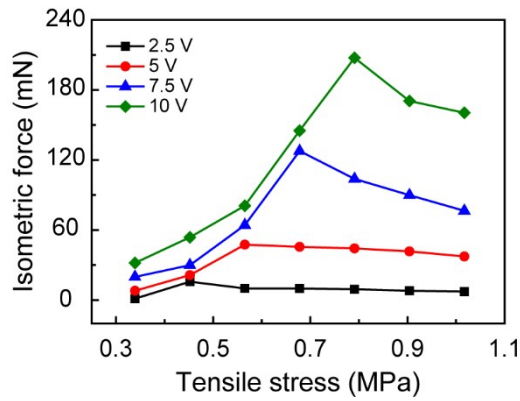

**Fig. S22** The isometric stress of the MXene/SWCNTs-coated CNT@PDMS coaxial muscle fiber under different voltages (2.5 V, 5 V, 7.5 V and 10 V) with different loads (6 g, 8 g, 10 g, 12 g, 14 g, 16 g and 18 g).

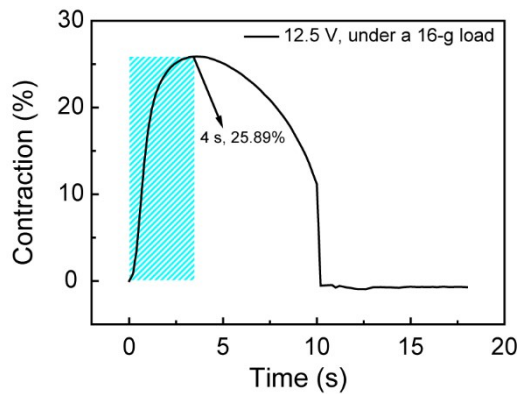

**Fig. S23** The ultimate contraction after the MXene/SWCNTs-coated CNT@PDMS coaxial muscle fiber was blown by applying a 12.5 V voltage.

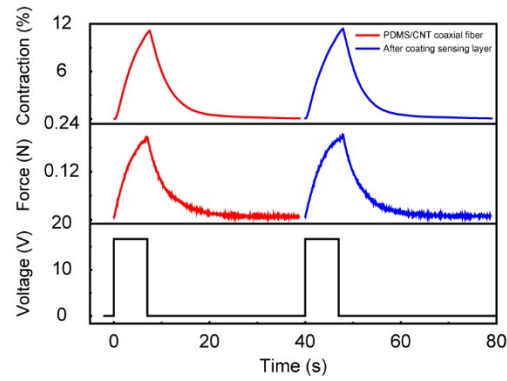

**Fig. S24** The curves of the contraction and isometric force of the CNT@PDMS coaxial muscle fiber before and after coating sensing layer under a 10 V voltage with a 14 g load.

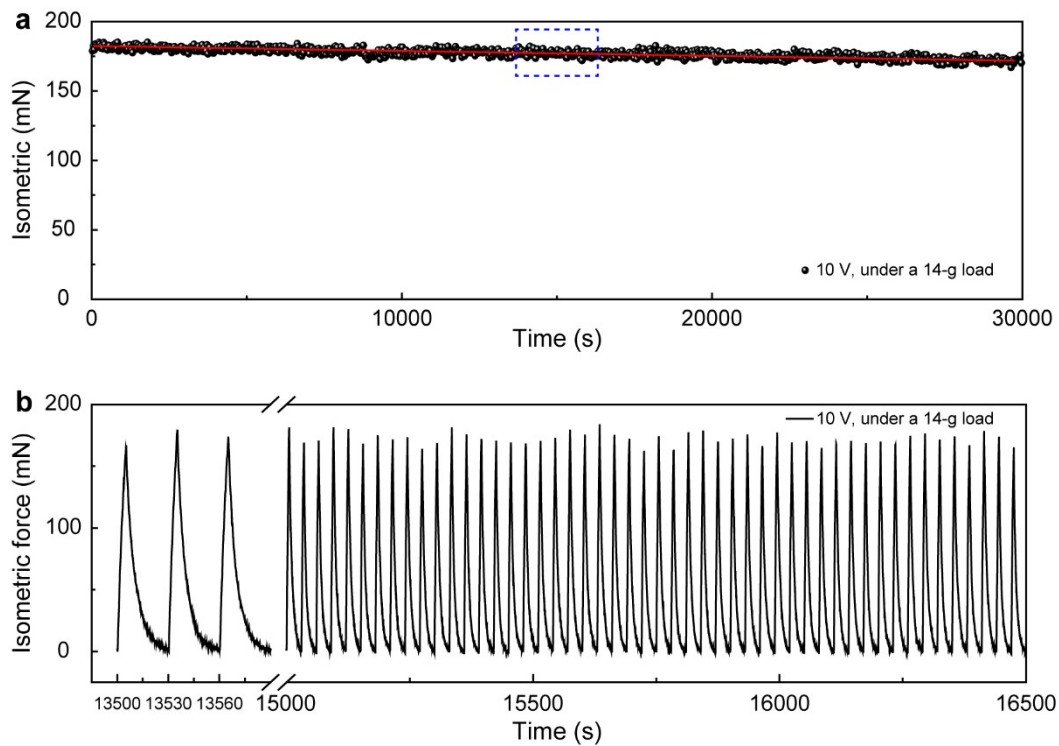

**Fig. S25** (a) Cyclic tests of the isometric force (under a 10 V voltage with a 14 g load, powering on for 5 s and powering off for 25 s) on the MXene/SWCNTs-coated CNT@PDMS coaxial muscle fiber, 1 000 actuating cycles. (b) The curve of the 100 actuating cycles from 450th to 550th.

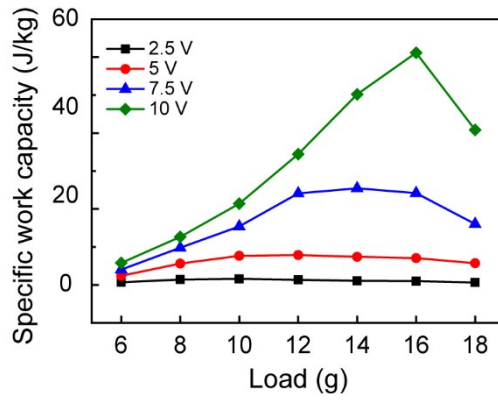

**Fig. S26** The specific work capacity of the MXene/SWCNTs-coated CNT@PDMS coaxial muscle fiber under different voltages (2.5 V, 5 V, 7.5 V and 10 V) with different loads (6 g, 8 g, 10 g, 12 g, 14 g, 16 g and 18 g).

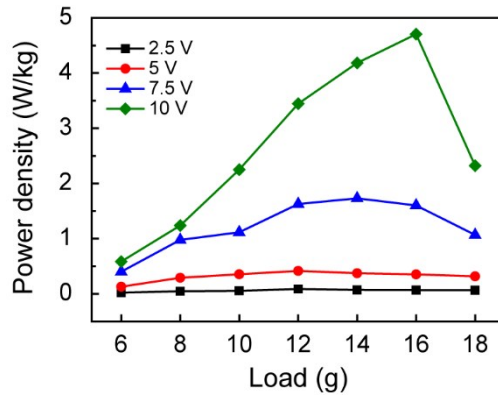

**Fig. S27** The power density of the MXene/SWCNTs-coated CNT@PDMS coaxial muscle fiber under different voltages (2.5 V, 5 V, 7.5 V and 10 V) with different loads (6 g, 8 g, 10 g, 12 g, 14 g, 16 g and 18 g).

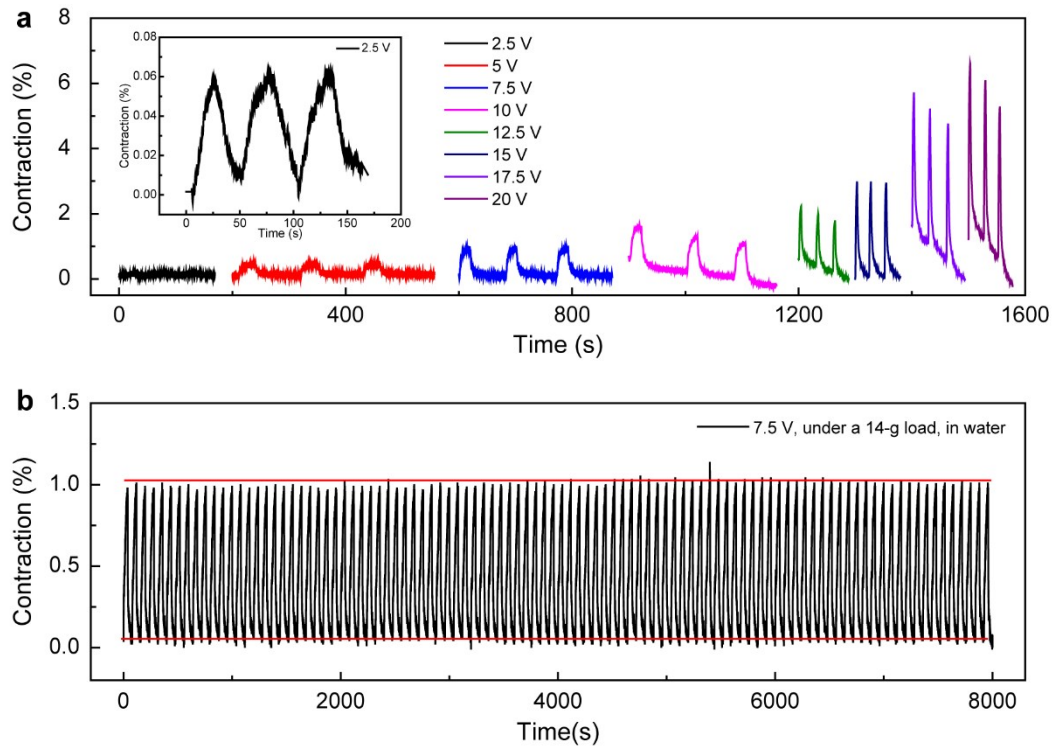

**Fig. S28** (a) The contraction of the CNT@PDMS coaxial muscle fiber under different voltages (2.5 V, 5 V, 7.5 V, 10 V, 12.5 V, 15 V, 17.5 V and 20 V) with a 14 g load in water for three cycles. (b) Cyclic tests of the contraction in water (under a 7.5 V voltage with a 14 g load, powering on for 40 s and powering off for 40 s) on the PDMS/CNT coiled coaxial fiber artificial muscle 100 actuating cycles.

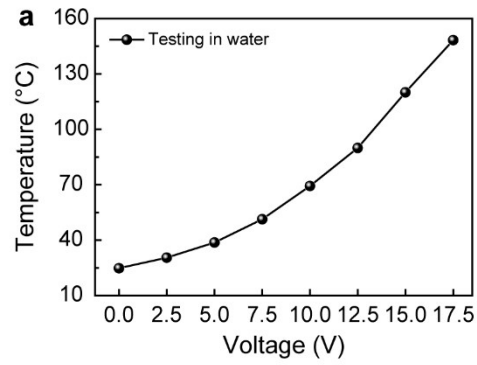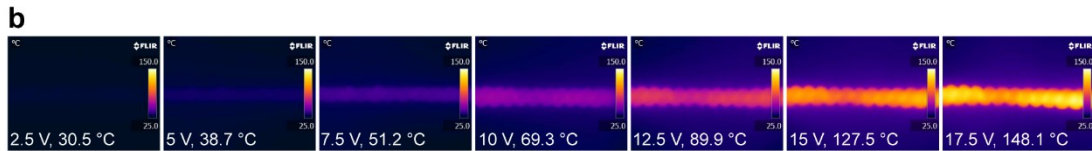

**Fig. S29** (a) The temperature of the 2-cm-long CNT@PDMS coaxial muscle fiber under different voltage (2.5 V, 5 V, 7.5 V, 10 V, 12.5 V, 15 V and 17.5 V) during the contracted process in water. (b) FLIR images of the maximum actuating temperature before the end of the contracted process of the 2-cm-long CNT@PDMS coaxial muscle fiber under different voltage in water.

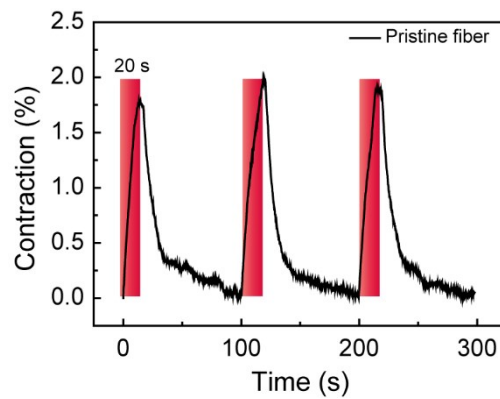

**Fig. S30** The contraction of the CNT@PDMS coaxial muscle fiber driven by infrared light with a 14 g load for three cycles.

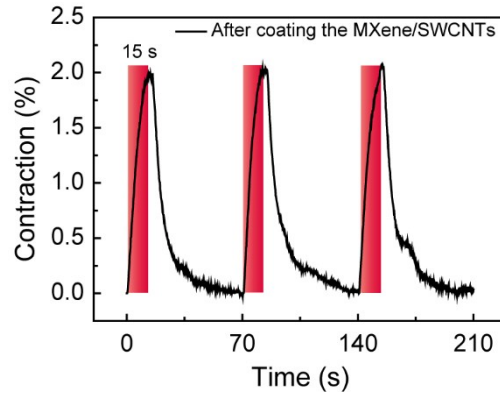

**Fig. S31** The contraction of the MXene/SWCNTs-coated CNT@PDMS coaxial muscle fiber driven by infrared light with a 14 g load for three cycles.

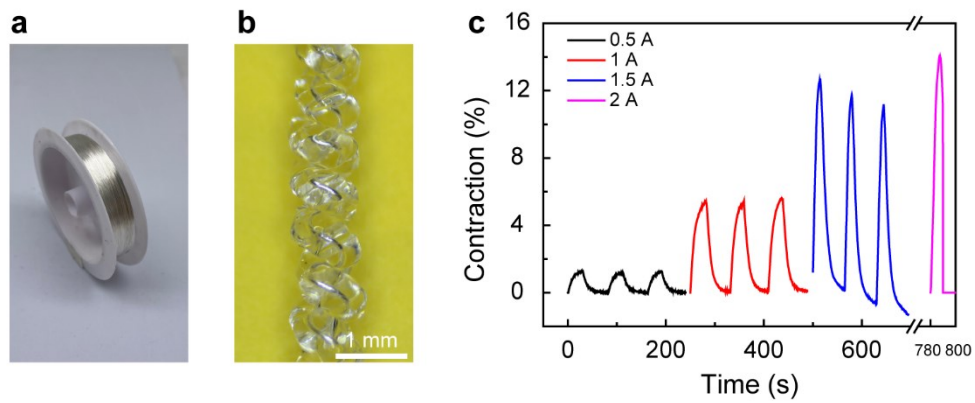

**Fig. S32** (a) Photograph of a hundreds-meter-long Ag fiber wound on a mandrel. The diameter of the Ag fiber is 100  $\mu\text{m}$ . (b) The photograph under the electron microscope of the Ag@PDMS coiled coaxial fiber. (c) The contraction of the Ag@PDMS coaxial muscle fiber under different currents (0.5 A, 1 A, 1.5 A and 2 A) with a 14 g load for three cycles.

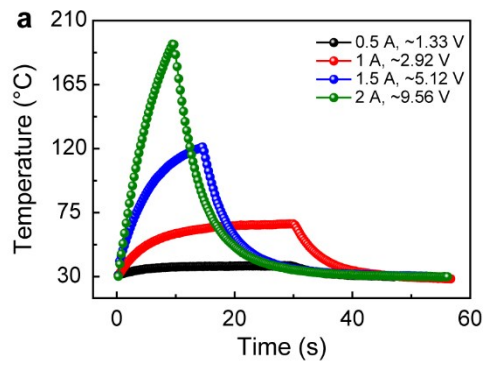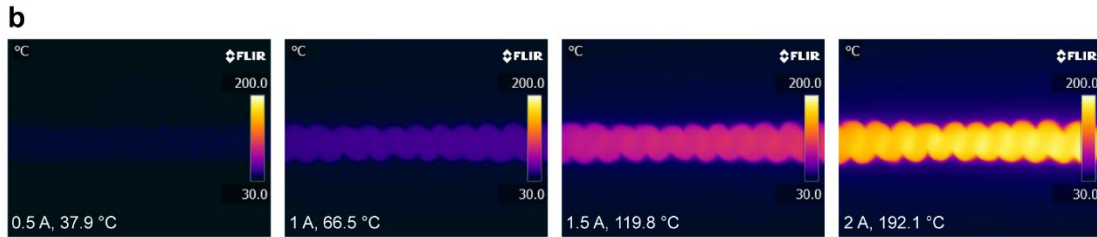

**Fig. S33** (a) The temperature of the 2-cm-long Ag@PDMS coaxial muscle fiber under different currents (0.5 A, 1 A, 1.5 A and 2 A) during the contracted process. (b) FLIR images of the maximum actuating temperature before the end of the contracted process of the 2-cm-long Ag@PDMS coaxial muscle fiber under different currents.

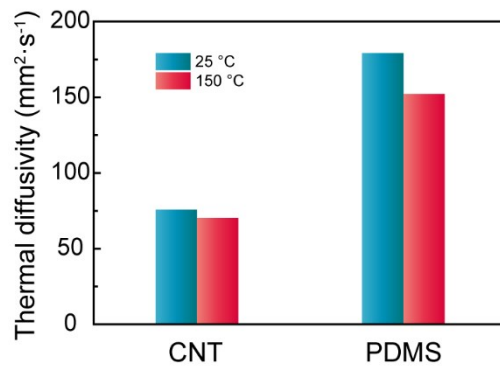

**Fig. S34** The thermal diffusivity of the CNT and PDMS at 25 °C and 150 °C.

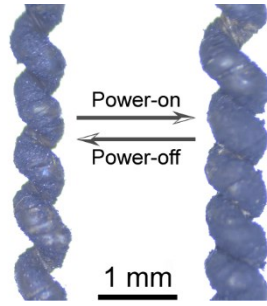

**Fig. S35** The photographs under the electron microscope of electrothermally in-situ driven process of the MXene/SWCNTs-coated CNT@PDMS coaxial muscle fiber (under a 10 V voltage with a 14 g load).

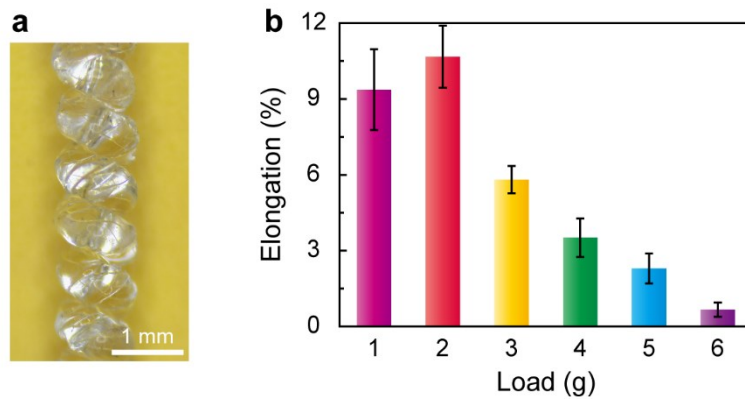

**Fig. S36** (a) The photograph under the electron microscope of the PDMS muscle fiber. (b) The elongation of the PDMS muscle fiber exposed to the n-heptane solvent under different loads (1g, 2g, 3g, 4g, 5g and 6g).

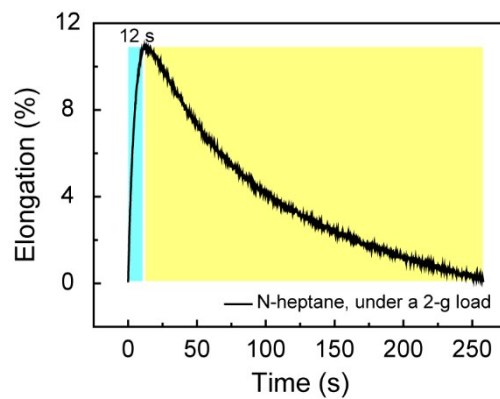

**Fig. S37** The curve of the elongation as a function of time of the PDMS muscle fiber exposed to n-heptane solvent under a 2 g load.



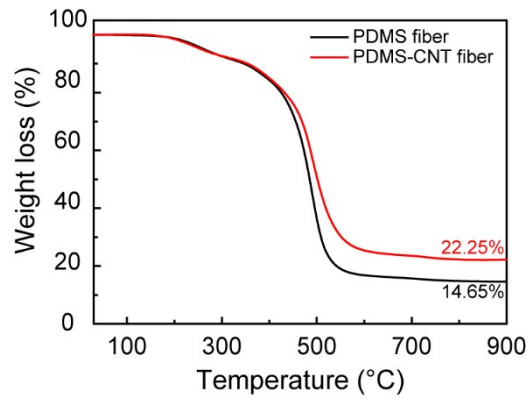

**Fig. S38** The TG analysis of the CNT@PDMS fiber.

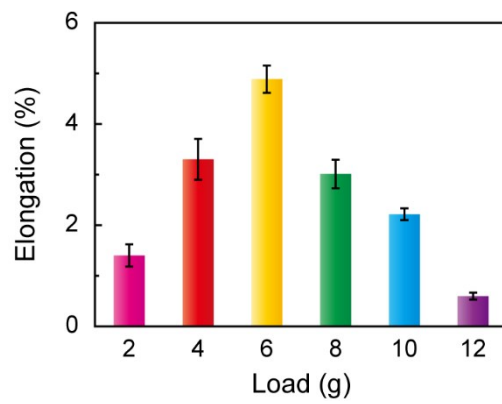

**Fig. S39** The elongation of the MXene/SWCNTs-coated CNT@PDMS coaxial muscle fiber exposed to n-heptane solvent under different loads.

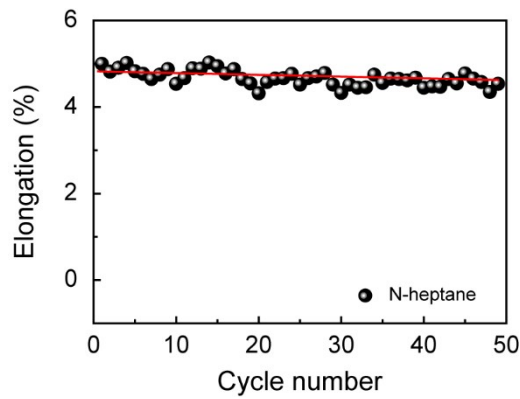

**Fig. S40** Cyclic tests (exposed to n-heptane solvent under a 6 g load) on the MXene/SWCNTs-coated CNT@PDMS coaxial muscle fiber, 50 actuating cycles.

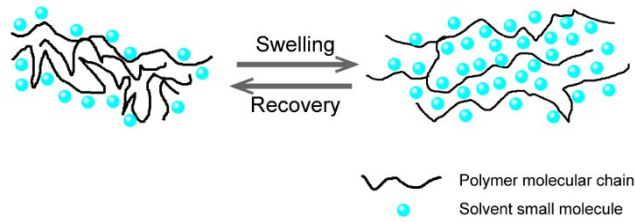

**Fig. S41** Swelling process of amorphous polymers and solvents with similar polarities.

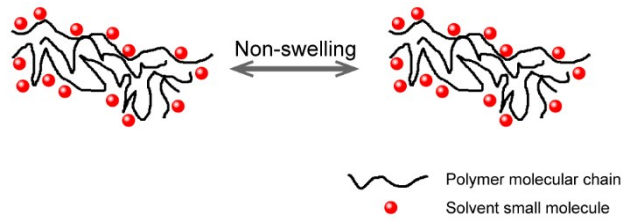

**Fig. S42** Solvent small molecules and polymer molecular chain with the different polarities are immiscible.

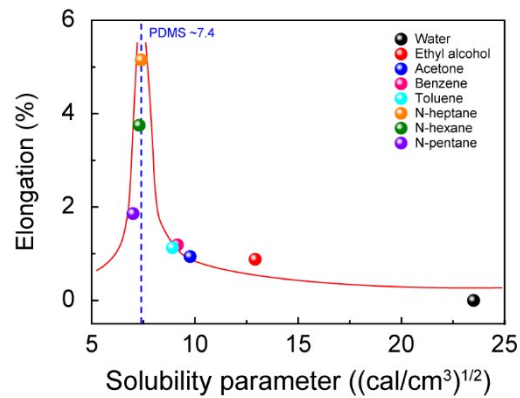

**Fig. S43** The relationship between solubility parameters of different solvents and the elongation of the CNT@PDMS coaxial muscle fiber.

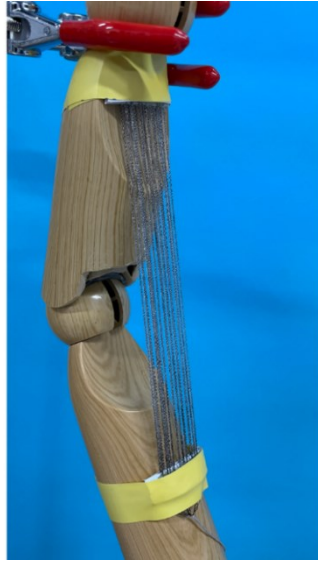

**Fig. S44** The bundling of 20-ply CNT@PDMS coaxial muscle fiber.

**Table S1.** Comparison of the tensile contraction and the work capacity between the literature results for electrothermal coiled muscle fibers composed of CNT/polymer and the present results for our CNT@PDMS coaxial muscle fiber.

| Materials                                         | Contraction (%) | Work capacity (J kg <sup>-1</sup> ) | Ref.             |
|---------------------------------------------------|-----------------|-------------------------------------|------------------|
| <i>Typical mammalian skeletal muscles</i>         | ~20             | 7.7                                 | 1                |
| CNT and silicone rubber                           | ~7              | -                                   | 2                |
| CNT and paraffin waxes                            | 7.3             | 160                                 | 3                |
| CNT and polyethylene oxide (PEO-SO <sub>3</sub> ) | ~8              | 1050                                | 4                |
| CNT and silicone elastomers                       | 9.7             | 490                                 | 5                |
| CNT and epoxy resin                               | 12              | -                                   | 6                |
| CNT and polyurethane (PU)                         | ~13             | 1100                                | 4                |
| CNT and thermoplastic polyurethanes (TPU)         | ~13.8           | 78.6                                | 7                |
| CNT and PDMS                                      | 19              | 61.2                                | <b>This work</b> |

**Table S2.** The dielectric constant, polarity, and solubility parameter of different solvents; the elongation of the CNT/PDMS coaxial muscle fiber in response to different solvents.

| Solvent       | Permittivity C <sup>2</sup> /(N·M <sup>2</sup> ) <sup>8</sup> | Polarity  | Solubility parameter (cal/cm <sup>3</sup> ) <sup>1/2 8</sup> | Elongation % |
|---------------|---------------------------------------------------------------|-----------|--------------------------------------------------------------|--------------|
| Water         | 78.5 (25 °C)                                                  |           | 23.50                                                        | 0            |
| Ethyl alcohol | 24.3 (25 °C)                                                  | Polar     | 12.92                                                        | 0.88         |
| Acetone       | 20.7 (25 °C)                                                  |           | 9.77                                                         | 0.94         |
| Benzene       | 2.27 (25 °C)                                                  |           | 9.15                                                         | 1.19         |
| Toluene       | 2.38 (25 °C)                                                  |           | 8.91                                                         | 1.13         |
| <b>PDMS</b>   | 2.75 (25 °C)                                                  | Non-polar | ~7.4                                                         | -            |
| N-heptane     | 1.8 (20 °C)                                                   |           | 7.4                                                          | 5.15         |
| N-hexane      | 1.9 (25 °C)                                                   |           | 7.3                                                          | 3.75         |
| N-pentane     | 1.8 (20 °C)                                                   |           | 7.0                                                          | 1.86         |

## References:

- 1 T. Mirfakhrai, J. D. W. Madden and R. H. Baughman, *Mater. Today*, 2007, **10**, 30-38.
- 2 M. D. Lima, M. W. Hussain, G. M. Spinks, S. Naficy, D. Hagenasr, J. S. Bykova, D. Tolly and R. H. Baughman, *Small*, 2015, **11**, 3113-3118.
- 3 M. D. Lima, N. Li, M. Jung de Andrade, S. Fang, J. Oh, G. M. Spinks, M. E. Kozlov, C. S. Haines, D. Suh, J. Foroughi, S. J. Kim, Y. Chen, T. Ware, M. K. Shin, L. D. Machado, A. F. Fonseca, J. D. Madden, W. E. Voit, D. S. Galvao and R. H. Baughman, *Science*, 2012, **338**, 928-932.
- 4 J. Mu, M. Jung de Andrade, S. Fang, X. Wang, E. Gao, N. Li, S. H. Kim, H. Wang, C. Hou, Q. Zhang, M. Zhu, D. Qian, H. Lu, D. Kongahage, S. Talebian, J. Foroughi, G. Spinks, H. Kim, T. H. Ware, H. J. Sim, D. Y. Lee, Y. Jang, S. J. Kim and R. H. Baughman, *Science*, 2019, **365**, 150-155.
- 5 S. P. Dai, X. S. Zhou, X. H. Hu, X. Dong, Y. Y. Jiang, G. G. Cheng, N. Y. Yuan and J. N. Ding, *Acs Applied Nano Materials*, 2021, **4**, 5123-5130.
- 6 L. Xu, Q. Peng, Y. Zhu, X. Zhao, M. Yang, S. Wang, F. Xue, Y. Yuan, Z. Lin, F. Xu, X. Sun, J. Li, W. Yin, Y. Li and X. He, *Nanoscale*, 2019, **11**, 8124-8132.
- 7 Y. Song, S. Zhou, K. Jin, J. Qiao, D. Li, C. Xu, D. Hu, J. Di, M. Li, Z. Zhang and Q. Li, *Nanoscale*, 2018, **10**, 4077-4084.
- 8 M. Rubinstein, R. H. Colby, *Polymer Physics (Chemistry)*, 2011, **9**, 019852059X.
